# Supplementary material for: Perineal Wound Closure Following Abdominoperineal Resection and Pelvic Exenteration for Cancer: A Systematic Review and Meta-Analysis
Source: PubMed Central journal article supplement (PMC7916499; doi:10.3390/cancers13040721), 2021-02-10
Supplement: cancers-13-00721-s001.pdf [file cancers-13-00721-s001.pdf]

# Supplementary Materials: Perineal Wound Closure Following Abdominoperineal Resection and Pelvic Exenteration for Cancer: A Systematic Review and Meta-Analysis

Etienne Buscail, Cindy Canivet, Jason Shourick, Elodie Chantalat, Nicolas Carrere, Jean-Pierre Duffas, Antoine Philis, Emilie Bérard, Louis Buscail, Laurent Ghouti and Benoit Chaput

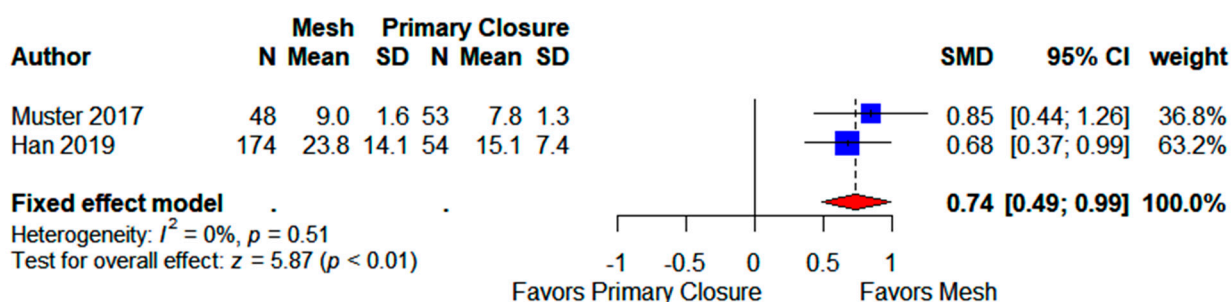

Figure S1. Forest plot for total length of stay mesh versus primary closure.

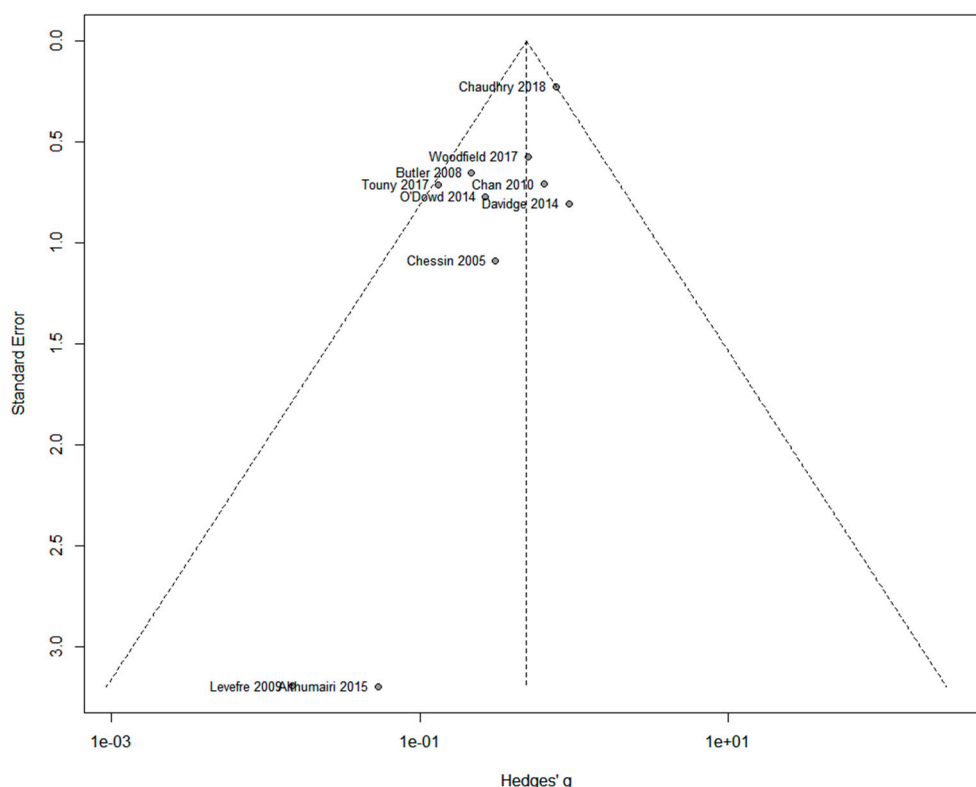

Figure S2. Funnel plot analyses for the detection of publication bias: flap vs primary closure group.

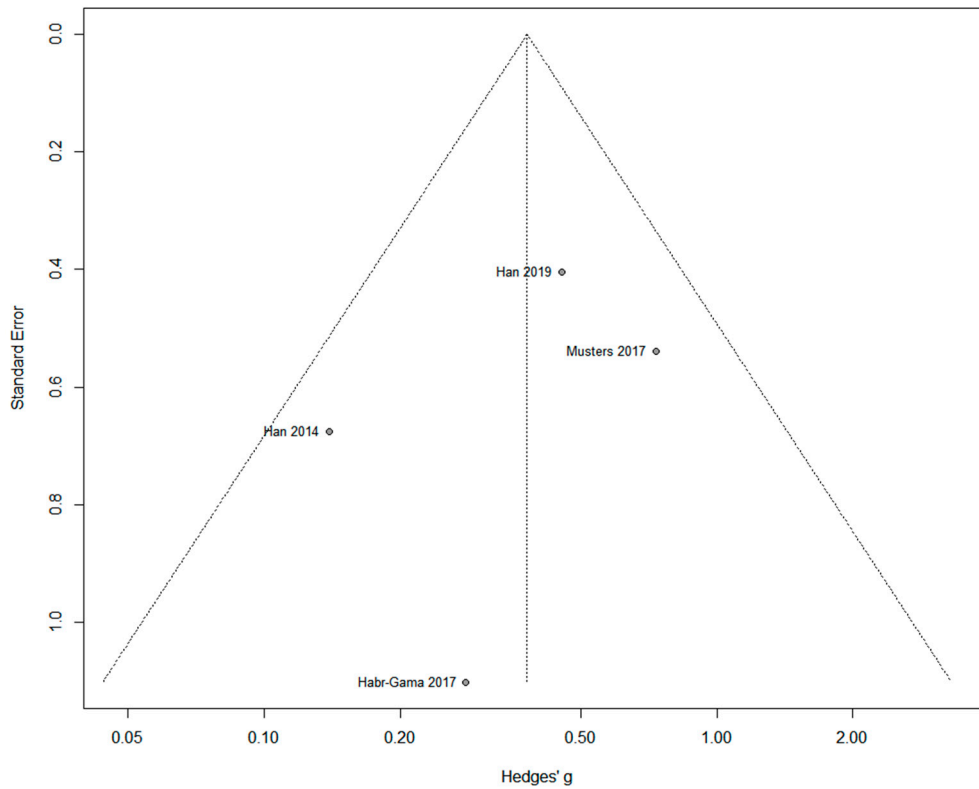

**Figure S3.** Funnel plot analyses for the detection of publication bias: mesh vs primary closure group.

**Table S1.** Electronic search strategy.

**Supplementary Table 1-1. Electronic Search Strategy in the PUBMED-Library and Cochrane Library**

Database: Medline via PubMed and Cochrane library  
 Filters: Publication date from 2000/01/01 and English  
 Initial search performed; September 6th 2019  
 Last rerun performed; March 28th 2020  
 Total hits: 2588

**Search Terms**

(abdominoperineal[tiab] OR abdominal perineal[tiab] OR APR[tiab] OR APER[tiab] OR ELAPE[tiab] OR proctectomy[tiab] OR abdominoperineal resection [tiab] OR abdominoperineal excision [tiab] AND( Wound Healing [tiab] OR Surgical Wound Infection [tiab] OR Postoperative Complications[tiab] OR complication [tiab] OR morbidity [tiab] OR abscess [tiab] OR mortality[tiab] OR Wound [tiab] OR Healing [tiab] OR Reconstruction [tiab] OR Repair [tiab] OR flap [tiab] OR biological mesh [tiab] OR mesh [tiab] OR primary closure [tiab] OR length of stay [tiab] OR post-operative length of stay [tiab] )

**Supplementary Table 1-2. Electronic Search Strategy in the EMBASE Library**

Database: EMBASE  
 Filters: Publication date from 2000/01/01 and English  
 Initial search performed; September 6th 2019  
 Last rerun performed; March 28th 2020  
 Total hits: 2588

**Search Terms**

(abdominoperineal OR abdominal perineal' OR APR' OR APER' OR ELAPE' OR proctectomy' OR abdominoperineal resection 'OR abdominoperineal excision ')

AND (Wound Healing 'OR Surgical Wound Infection 'OR Postoperative Complications' OR complication 'OR morbidity 'OR abscess 'OR mortality' OR Wound 'OR Healing 'OR Reconstruction 'OR Repair 'OR flap 'OR biological mesh 'OR mesh 'OR primary closure 'OR length of stay 'OR post-operative length of stay ')

Table S2. Southampton wound assessment scale.

| Grade | Definition                                                                                      | Appearance                                                                                      |
|-------|-------------------------------------------------------------------------------------------------|-------------------------------------------------------------------------------------------------|
| 0     | Normal healing                                                                                  |                                                                                                 |
| I     | Normal healing with mild bruising or haematoma                                                  | A–some bruising<br>B–considerable bruising<br>C–mild erythema                                   |
| II    | Erythema plus other signs of inflammation                                                       | A–at one point<br>B–around sutures<br>C–along wound<br>D–around wound                           |
| III   | Clear or haemoserous discharge                                                                  | A–at one point only (<2 cm)<br>B–along wound (>2 cm)<br>C–large volume<br>D–prolonged (>3 days) |
| IV    | Pus                                                                                             | A–at one point only (<2 cm) B–along wound (>2 cm)                                               |
| V     | Deep or severe wound infection with or without tissue breakdown; haematoma requiring aspiration |                                                                                                 |

Table S3. Newcastle Ottawa scale details.

| Study                  | Year | Newcastle Ottawa scale |               |          | Total |
|------------------------|------|------------------------|---------------|----------|-------|
|                        |      | Selection              | Comparability | Outcomes |       |
| Ghouti et al. [21]     | 2005 | ★★★★                   | ☆☆            | ★★★      | 5     |
| Chessin et al. [6]     | 2005 | ★★★★                   | ★☆☆           | ☆☆☆      | 5     |
| Butler et al. [7]      | 2008 | ★★★★                   | ★☆☆           | ☆☆☆      | 5     |
| Lefevre et al. [22]    | 2009 | ★★★★                   | ★★            | ★★★      | 7     |
| Chan et al. [23]       | 2010 | ★★★★                   | ☆☆            | ☆☆☆      | 4     |
| Stelzner et al. [24]   | 2011 | ★★★★                   | ☆☆            | ☆☆☆      | 3     |
| Jacombs et al. [33]    | 2013 | ★★★★                   | ★☆☆           | ☆☆☆      | 5     |
| Chokshi et al. [32]    | 2013 | ★★★★                   | ★☆☆           | ☆☆☆      | 5     |
| O'Dowd et al. [27]     | 2014 | ★★★★                   | ★☆☆           | ★★★      | 8     |
| Touny et al. [28]      | 2014 | ★★★★                   | ★★            | ★★★      | 9     |
| Davidge et al. [25]    | 2014 | ★★★★                   | ☆☆            | ☆☆☆      | 4     |
| Han et al. [31]        | 2014 | ★★★★                   | ★★            | ★★★      | 9     |
| Althumairi et al. [26] | 2015 | ★★★★                   | ☆☆            | ☆☆☆      | 4     |
| Woodfield et al. [29]  | 2015 | ★★★★                   | ☆☆            | ☆☆☆      | 3     |
| Musters et al. [10]    | 2017 | ★★★★                   | ★★            | ★★★      | 9     |
| Habr-Gama et al [18].  | 2017 | ★★★★                   | ★☆☆           | ★★★      | 6     |
| Chaudhry et al. [30]   | 2018 | ★★★★                   | ★☆☆           | ☆☆☆      | 5     |
| Han et al. [9]         | 2019 | ★★★★                   | ★☆☆           | ★★★      | 6     |

Table S4. Flap vs. primary closure: flap group general characteristics.

| Study             | Number of Patients * | Number of Patients Included in Flap Analysis | age Mean (Range) | Age Med (Range) | Rectal cancer | Anal cancer | Other indication | Neo-adjuvant RT short course | Neo-adjuvant RT long course | neo adjuvant CT |
|-------------------|----------------------|----------------------------------------------|------------------|-----------------|---------------|-------------|------------------|------------------------------|-----------------------------|-----------------|
| Ghouti 2005 [21]  | 41                   | 26                                           | NA               | 57.9 (32–82)    | 0             | 26          | 0                | 0                            | 26                          | 10              |
| Chessin 2005 [6]  | 78                   | 19                                           | 56.5 (32–74)     | NA              | 12            | 7           | 0                | 0                            | 19                          | 19              |
| Butler 2008 [7]   | 111                  | 35                                           | 54 (SD 13.8)     | NA              | 30            | 5           | 0                | 0                            | 35                          | 35              |
| Lefevre 2009 [22] | 95                   | 43                                           | 56.3 (SD 11.9)   | NA              | 0             | 43          | 0                | 0                            | 43                          | 43              |
| Chan              | 51                   | 30                                           | NA               | 65.5            | 30            | 0           | 0                | 0                            | 28                          | 28              |

|                             |     |     |                   |                 |     |     |     |    |     |    |
|-----------------------------|-----|-----|-------------------|-----------------|-----|-----|-----|----|-----|----|
| 2010 [23]                   |     |     |                   | (44-86)         |     |     |     |    |     |    |
| Stelzner<br>2011 [24]       | 74  | 28  | NA                | 66 (44-79)      | 28  | 0   | 0   | NA | NA  | NA |
| Jacombs<br>2013 [33]        | 203 | 39  | 56.3 (SD<br>14.4) | NA              | 39  | 0   | 0   | 0  | 21  | NA |
| Chokshi<br>2013 [32]        | 53  | 17  | NA                | 62(38-72)       | 36* | 2 * | 15* | NA | 13  | NA |
| Davidge<br>2014 [25]        | 177 | 52  | 58.9<br>(SD 10.3) | NA              | 52  | 0   | 0   | 0  | 44  | 44 |
| O'Dowd<br>2014 [27]         | 39  | 12  | 66.7<br>(SD 12.9) | NA              | 12  | 0   | 0   | 0  | 12  | 7  |
| Touny<br>2014 [28]          | 60  | 30  | NA                | 53.5<br>(26-68) | 30  | 0   | 0   | 0  | 30  | 30 |
| Althuma<br>iri 2015<br>[26] | 67  | 11  | 57                | NA              | 11  | 0   | 0   | 0  | 10  | 10 |
| Woodfie<br>ld 2017<br>[29]  | 68  | 31  | 63 (IQR18)        | NA              | 12  | 9   | 10  | NA | NA  | NA |
| Chaudhr<br>y 2018<br>[30]   | 562 | 274 | 62                | NA              | NA  | NA  | NA  | NA | 134 | 75 |

\* Entire cohort. SD, standard deviation, IQR interquartile range; NA, not available; RT, radiotherapy; CT, chemotherapy.

**Table S5.** Flap vs. primary closure: primary closure group characteristics general characteristics.

| Study                    | Number of Patients * | Number of Patients Included in Primary Closure Analysis | age Mean (Range)  | Age Med (Range) | Rectal Cancer | Anal Cancer | Other Indication | Neo-adjuvant RT Short Course | Neo-Adjuvant RT Long Course | Neo-Adjuvant CT |
|--------------------------|----------------------|---------------------------------------------------------|-------------------|-----------------|---------------|-------------|------------------|------------------------------|-----------------------------|-----------------|
| Ghouti<br>2005<br>[21]   | 41                   | 15                                                      | NA                | 57.2<br>(32-82) | 0             | 15          | 0                | 0                            | 15                          | 11              |
| Chessin<br>2005 [6]      | 78                   | 59                                                      | 60.3<br>(25-80)   | NA              | 56            | 3           | 0                | 0                            | 59                          | 32              |
| Butler<br>2008 [7]       | 111                  | 76                                                      | 56.2<br>(SD 13.6) | NA              | 75            | 1           | 0                | 0                            | 76                          | 76              |
| Lefevre<br>2009<br>[21]  | 95                   | 52                                                      | 62.1<br>(SD 13)   | NA              | 0             | 52          | 0                | 0                            | 52                          | 52              |
| Chan<br>2010<br>[23]     | 51                   | 21                                                      | NA                | 67.8<br>(36-87) | 21            | 0           | 0                | 0                            | 13                          | 13              |
| Stelzner<br>2011<br>[24] | 74                   | 46                                                      | NA                | 64<br>(44-82)   | 46            | 0           | 0                | NA                           | NA                          | NA              |
| Jacombs<br>2013<br>[33]  | 203                  | 164                                                     | 60.6<br>(SD12.9)  | NA              | 164           | 0           | 0                | 0                            | 58                          | NA              |
| Chokshi<br>2013<br>[32]  | 53                   | 36                                                      | NA                | 55<br>(40-80)   | 36*           | 2 *         | 15*              | NA                           | 24                          | NA              |
| Davidg<br>e 2014<br>[25] | 177                  | 125                                                     | 59.8<br>(SD 13.4) | NA              | 125           | 0           | 0                | 0                            | 106                         | 106             |
|                          | 39                   | 27                                                      | 61.5              | NA              | 27            | 0           | 0                | 0                            | 20                          | 17              |



|                      |     |     |     |    |    |    |    |                                   |
|----------------------|-----|-----|-----|----|----|----|----|-----------------------------------|
| Ghouti 2005 [21]     | 41  | 26  | 0   | 26 | 0  | 3  | 0  | 67 (15–155)                       |
| Chessin 2005 [6]     | 78  | 19  | 19  | 0  | 0  | 0  | NA | NA                                |
| Butler 2008 [7]      | 111 | 35  | 35  | 0  | 0  | 1  | 2  | 38.4 (SD27.6)                     |
| Lefevre 2009 [22]    | 95  | 43  | 0   | 43 | 0  | 0  | 0  | 25.9 (1.5–174.3)                  |
| Chan 2010 [23]       | 51  | 30  | 30  | 0  | 0  | 5  | NA | 17 (1–38)                         |
| Stelzner 2011 [24]   | 74  | 28  | 0   | 28 | 0  | 0  | NA | NA                                |
| Jacombs 2013 [33]    | 203 | 39  | 0   | 0  | 39 | 9  | NA | NA                                |
| Chokshi 2013 [32]    | 53  | 17  | 0   | 0  | 17 | 2  | NA | 11.5(1–60)                        |
| Davidge 2014 [25]    | 177 | 52  | 18  | 0  | 34 | 1  | NA | 17.2                              |
| O'Dowd 2014 [27]     | 39  | 12  | 12  | 0  | 0  | 0  | 0  | 18.2 primary SD 13.8 /15.2 SD 6.8 |
| Touny 2014 [28]      | 60  | 30  | 30  | 0  | 0  | 0  | NA | NA                                |
| Althumairi 2015 [26] | 67  | 11  | 11  | 0  | 0  | NA | NA | 19.4                              |
| Woodfield 2017 [29]  | 68  | 31  | 31  | 0  | 0  | 2  | 2  | NA                                |
| Chaudhry 2018 [30]   | 562 | 274 | 274 | 0  | 0  | NA | 10 | 26                                |

\* Entire cohort SD, standard deviation; IQR interquartile range; APR, abdominoperineal resection; ELAPE, extra-levator abdominoperineal excision; NA, not available.

**Table S9.** Flap vs. primary closure: primary closure group surgical data.

| Study              | Number of Patients * | Number of Patients   |  | APR (n) | ELAPE (n) | Pelvic Exenteration (n) | Hernia (n) | Follow-Up (Month Med Range) |
|--------------------|----------------------|----------------------|--|---------|-----------|-------------------------|------------|-----------------------------|
|                    |                      | Included in Analysis |  |         |           |                         |            |                             |
| Ghouti 2005 [21]   | 41                   | 15                   |  | 0       | 15        | 0                       | 0          | 67 (15–155)                 |
| Chessin 2005 [6]   | 78                   | 59                   |  | 59      | 0         | 0                       | NA         | NA                          |
| Butler 2008 [7]    | 111                  | 76                   |  | 76      | 0         | 0                       | 4          | 50.4 (SD32.4)               |
| Lefevre 2009 [22]  | 95                   | 52                   |  | 0       | 52        | 0                       | 7          | 40.7 (1.5–174.3)            |
| Chan 2010 [23]     | 51                   | 21                   |  | 21      | 0         | 0                       | NA         | 38 (16–58)                  |
| Stelzner 2011 [24] | 74                   | 46                   |  | 46      | 0         | 0                       | NA         | NA                          |
| Jacombs 2013 [33]  | 203                  | 164                  |  | 0       | 0         | 164                     | NA         | NA                          |
| Chokshi 2013 [32]  | 53                   | 36                   |  | 0       | 0         | 36                      | NA         | 11.5 (1–60)                 |
| Davidge 2014 [25]  | 177                  | 125                  |  | 109     | 0         | 16                      | NA         | 14                          |
| O'Dowd 2014 [27]   | 39                   | 27                   |  | 27      | 0         | 0                       | 0          | 16.8                        |
| Touny 2014 [28]    | 60                   | 30                   |  | 30      | 0         | 0                       | NA         | NA                          |

|                      |     |     |     |   |   |    |      |
|----------------------|-----|-----|-----|---|---|----|------|
| Althumairi 2015 [26] | 67  | 56  | 56  | 0 | 0 | NA | 31.5 |
| Woodfield 2015 [29]  | 68  | 37  | 37  | 0 | 0 | 0  | NA   |
| Chaudhry 2018 [30]   | 562 | 288 | 288 | 0 | 0 | 10 | 26   |

\* Entire cohort SD, standard deviation; IQR interquartile range; APR, abdominoperineal resection; ELAPE, extra-levator abdominoperineal excision; NA, not available.

**Table S10.** Mesh vs primary closure: mesh closure group surgical data.

| Study               | Number of Patients * | Number of Patients Included in Analysis | APR( ELAPE Hernia n) (n) (n) |     |    | Length of Stay (day Med Range) | Follow-Up (Month Med Range) |
|---------------------|----------------------|-----------------------------------------|------------------------------|-----|----|--------------------------------|-----------------------------|
| Han 2014 [31]       | 102                  | 83                                      | 0                            | 83  | 4  | 10(7–62)                       | 44(18–68)                   |
| Musters 2017 [10]   | 101                  | 48                                      | 0                            | 48  | 2  | 8(7–13)                        | 12                          |
| Habr-Gama 2017 [18] | 72                   | 22                                      | 3                            | 19  | NA | NA                             | NA                          |
| Han 2019 [9]        | 228                  | 174                                     | 0                            | 174 | 7  | 13 (7–62)                      | 71.5 (21–120)               |

\* Entire cohort SD, standard deviation; IQR interquartile range; APR, abdominoperineal resection; ELAPE, extra-levator abdominoperineal excision.

**Table S11.** Mesh vs. primary closure: primary closure surgical data.

| Study               | Number of Patients* | Number of Patients Included in Analysis | APR( ELAPE Hernia n) (n) (n) |    |    | Length of Stay (Day Med Range) | Follow-Up (Month Med Range) |
|---------------------|---------------------|-----------------------------------------|------------------------------|----|----|--------------------------------|-----------------------------|
| Han 2014 [31]       | 102                 | 19                                      | 0                            | 19 | 2  | 10 (7–62)                      | 44 (18–68)                  |
| Musters 2017 [10]   | 101                 | 53                                      | 0                            | 53 | 4  | 7 (6–11)                       | 12                          |
| Habr-Gama 2017 [18] | 72                  | 48                                      | 47                           | 1  | NA | NA                             | NA                          |
| Han 2019 [9]        | 228                 | 54                                      | 0                            | 54 | 6  | 11 (5–37)                      | 58.5 (31–84)                |

\* Entire cohort SD, standard deviation; IQR interquartile range; APR, abdominoperineal resection; ELAPE, extra-levator abdominoperineal excision; NA, not available.

**Table S12.** Flap vs. primary closure: Total wound complication.

| Study                | Flap Closure(n) | Number of Complications | % of Complication Flap Closure | Primary Closure (n) | Number of Complications | % of Complication Primary Closure |
|----------------------|-----------------|-------------------------|--------------------------------|---------------------|-------------------------|-----------------------------------|
| Ghouthi 2005 [21]    | 15              | 11                      | 73                             | 26                  | 17                      | 65                                |
| Chessin 2005 [6]     | 19              | 16                      | 84                             | 59                  | 44                      | 74                                |
| Butler 2008 [7]      | 35              | 12                      | 34                             | 76                  | 32                      | 42                                |
| Lefevre 2009 [22]    | 41              | 11                      | 25                             | 43                  | 19                      | 36                                |
| Chan 2010 [23]       | 30              | 10                      | 33                             | 21                  | 9                       | 42                                |
| Stelzner 2011 [24]   | 28              | 3                       | 10                             | 46                  | 8                       | 17                                |
| Jacombs 2012 [33]    | 39              | 28                      | 71                             | 164                 | 64                      | 39                                |
| Chokshi 2013 [32]    | 17              | 13                      | 76                             | 36                  | 26                      | 72                                |
| Davidge 2014 [25]    | 52              | 28                      | 54                             | 125                 | 42                      | 34                                |
| O'Dowd 2014 [27]     | 12              | 3                       | 25                             | 27                  | 15                      | 55                                |
| Touny 2014 [28]      | 29              | 5                       | 17                             | 30                  | 14                      | 46                                |
| Althumairi 2015 [26] | 11              | 3                       | 27                             | 56                  | 24                      | 42                                |
| Woodfield 2017 [29]  | 31              | 17                      | 54                             | 37                  | 20                      | 54                                |
| Chaudhry 2018 [30]   | 274             | 53                      | 19                             | 288                 | 99                      | 34                                |

Table S13. Mesh vs. primary closure: Total wound complication.

| Study               | Mesh Closure(n) | Number of Complications | % of Complication Mesh | Primary Closure (n) | Number of Complications | % of Complication Primary |
|---------------------|-----------------|-------------------------|------------------------|---------------------|-------------------------|---------------------------|
| Han 2014 [31]       | 83              | 10                      | 12                     | 19                  | 7                       | 36                        |
| Musters 2017 [10]   | 48              | 16                      | 33                     | 53                  | 17                      | 32                        |
| Habr-Gama 2017 [18] | 22              | 6                       | 27                     | 48                  | 14                      | 29                        |
| Han 2019 [9]        | 174             | 21                      | 12                     | 54                  | 15                      | 27                        |

Table S14. Flap vs. primary closure: major wound complication.

| Study                | Flap Closure (n) | Number of Complications | % of Complication Flap Closure | Primary Closure (n) | Number of Complications | % of Complication Primary Closure |
|----------------------|------------------|-------------------------|--------------------------------|---------------------|-------------------------|-----------------------------------|
| Chessin 2005 [6]     | 19               | 5                       | 26                             | 59                  | 15                      | 25                                |
| Butler 2008 [7]      | 35               | 3                       | 8                              | 76                  | 23                      | 30                                |
| Levefre 2009 [22]    | 41               | 0                       | 0                              | 43                  | 6                       | 13                                |
| Chan 2010 [23]       | 30               | 5                       | 16                             | 21                  | 5                       | 23                                |
| Jacombs 2012 [33]    | 39               | 10                      | 25                             | 164                 | 23                      | 14                                |
| Chokshi 2013 [32]    | 17               | 11                      | 64                             | 36                  | 18                      | 50                                |
| Davidge 2014 [25]    | 52               | 12                      | 23                             | 125                 | 18                      | 14                                |
| O'Dowd 2014 [27]     | 12               | 3                       | 25                             | 27                  | 15                      | 55                                |
| Touny 2017 [28]      | 29               | 3                       | 10                             | 30                  | 14                      | 46                                |
| Althumairi 2015 [26] | 11               | 0                       | 0                              | 56                  | 8                       | 14                                |
| Woodfield 2017 [29]  | 31               | 6                       | 19                             | 37                  | 12                      | 32                                |
| Chaudhry 2018 [30]   | 274              | 41                      | 14                             | 288                 | 54                      | 18                                |

Table S15. Mesh vs primary closure: Major wound complication.

| Study               | Mesh Closure | Number of Complications | % of Complication Mesh | Primary Closure | Number of Complications | % of Complication Primary |
|---------------------|--------------|-------------------------|------------------------|-----------------|-------------------------|---------------------------|
| Han 2014 [31]       | 83           | 5                       | 6                      | 19              | 6                       | 31                        |
| Musters 2017 [10]   | 48           | 7                       | 14                     | 53              | 10                      | 18                        |
| Habr-Gama 2017 [18] | 22           | 1                       | 4                      | 48              | 7                       | 14                        |
| Han 2019 [9]        | 174          | 20                      | 11                     | 54              | 12                      | 22                        |

Table S16. Flap vs. primary closure: minor wound complication.

| Study                | Flap Closure (n) | Number of Complications | % of Complication Flap | Primary Closure (n) | Number of Complications | % of Complication primary |
|----------------------|------------------|-------------------------|------------------------|---------------------|-------------------------|---------------------------|
| Chessin 2005 [6]     | 19               | 11                      | 57                     | 59                  | 29                      | 37                        |
| Butler2008 [7]       | 35               | 9                       | 25                     | 76                  | 9                       | 11                        |
| Lefevre 2009 [22]    | 41               | 11                      | 26                     | 43                  | 13                      | 30                        |
| Chan 2010 [23]       | 30               | 5                       | 16                     | 21                  | 4                       | 19                        |
| Jacombs 2012 [33]    | 39               | 25                      | 64                     | 164                 | 22                      | 13                        |
| Chokshi 2013 [32]    | 17               | 2                       | 11                     | 36                  | 8                       | 22                        |
| Davidge 2014 [25]    | 52               | 16                      | 31                     | 125                 | 24                      | 19                        |
| Touny 2014 [28]      | 29               | 3                       | 10                     | 30                  | 10                      | 33                        |
| Althumairi 2015 [26] | 11               | 3                       | 27                     | 56                  | 16                      | 29                        |
| Woodfield 2017 [29]  | 31               | 11                      | 35                     | 37                  | 8                       | 21                        |
| Chaudhry 2018 [30]   | 274              | 12                      | 4                      | 288                 | 45                      | 15                        |

Table S17. Mesh vs. primary closure: Major wound complication.

| Study | Mesh Closure (n) | Number of Complications | % of Complication Mesh | Primary Closure (n) | Number of Complications | % of Complication Primary |
|-------|------------------|-------------------------|------------------------|---------------------|-------------------------|---------------------------|
|-------|------------------|-------------------------|------------------------|---------------------|-------------------------|---------------------------|



|                     |     |   |     |    |   |    |
|---------------------|-----|---|-----|----|---|----|
| Han 2014 [31]       | 83  | 5 | 6   | 19 | 1 | 5  |
| Habr-Gama 2017 [18] | 22  | 5 | 22  | 48 | 7 | 14 |
| Musters 2017 [10]   | 48  | 9 | 18  | 53 | 7 | 13 |
| Han 2019 [9]        | 174 | 1 | 0.5 | 54 | 3 | 5  |

**Table S18.** Follow up: Flap vs primary closure.

| Study                | Number Flap | Number Primary | Mean Follow Up* | Med Follow Up* (Range) |
|----------------------|-------------|----------------|-----------------|------------------------|
| Ghouti 2005 [21]     | 15          | 26             | NR              | 67 (15–155)            |
| Chessin 2005 [6]     | 19          | 59             | NR              | NR                     |
| Butler 2008 [7]      | 35          | 76             | 38.4            | NR                     |
| Lefevre 2009 [22]    | 43          | 52             | 49.7            | NR                     |
| Chan 2010 [23]       | 30          | 21             | 17              | 18 (1–38)              |
| Stelzner 2011 [24]   | 28          | 46             | NR              | NR                     |
| Jacombs 2012 [33]    | 39          | 164            | NR              | NR                     |
| Chokshi 2013 [32]    | 17          | 36             | 11.5            | NR                     |
| Davidge 2014 [25]    | 52          | 125            | 24.4            | NR                     |
| O'Dowd 2014 [27]     | 12          | 27             | 18.2            | NR                     |
| Touny 2014 [28]      | 30          | 30             | NR              | NR                     |
| Althumairi 2015 [26] | 11          | 56             | 31.5            | NR                     |
| Woodfield 2017 [29]  | 31          | 37             | NR              | NR                     |
| Chaudhry 2018 [30]   | 274         | 288            | 26              | NR                     |

NR, not reported; SD, standard deviation; \* entire cohort.

**Table S19.** Follow up: mesh vs. primary closure.

| Study               | Number Mesh | Number Primary | Mean Follow Up* | Med Follow Up (Range)* |
|---------------------|-------------|----------------|-----------------|------------------------|
| Han 2014 [31]       | 83          | 19             | NR              | 44 (18–68)             |
| Musters 2017 [10]   | 48          | 53             | 12              | NR                     |
| Habr-Gama 2017 [18] | 22          | 48             | 14              | NR                     |
| Han 2019 [9]        | 174         | 54             | NR              | 71.5 (21–120)          |

NR, not reported; SD, standard deviation; \* entire cohort.

**Table S20.** Length of stay: flap vs. primary closure.

| Study                | Number Flap Closure | Length of Stay Mean | SD   | Length of Stay Med | Range Min | Range Max | Number Primary Closure | Length of Stay Mean | SD   | Length of Stay Med | Range Min | Range Max |
|----------------------|---------------------|---------------------|------|--------------------|-----------|-----------|------------------------|---------------------|------|--------------------|-----------|-----------|
| Ghouti 2005 [21]     | 15                  | 25.2                | 8.5  | 25                 | 12        | 40        | 26                     | 27.3                | 16   | 22                 | 12        | 80        |
| Chessin 2005 [6]     | 19                  | 11.3                | NR   | NR                 | NR        | NR        | 59                     | 12.2                | NR   | NR                 | NR        | NR        |
| Butler 2008 [7]      | 35                  | 9.1                 | 7.2  | NR                 | NR        | NR        | 76                     | 10.2                | 3.8  | NR                 | NR        | NR        |
| Lefevre 2009 [22]    | 43                  | 25.1                | 10.7 | NR                 | NR        | NR        | 52                     | 23.1                | 17.2 | NR                 | NR        | NR        |
| O'Dowd 2014 [27]     | 12                  | 19                  | 13.2 | NR                 | NR        | NR        | 27                     | 19.5                | 13.1 | NR                 | NR        | NR        |
| Touny 2014 [28]      | 30                  | NR                  | NR   | 7                  | 3         | 40        | 30                     | NR                  | NR   | 9                  | 6         | 49        |
| Althumairi 2015 [26] | 11                  | 13.4                | 9    | NR                 | NR        | NR        | 56                     | 9.3                 | 5    | NR                 | NR        | NR        |
| Woodfield 2017 [29]  | 31                  | NR                  | NR   | 13                 | IQR 12    | NR        | 37                     | NR                  | NR   | 13                 | IQR 8.5   | NR        |

NR, not reported; SD, standard deviation; IQR, interquartile range.

**Table S21.** length of stay: mesh vs primary closure.

| Study               | Number<br>Mesh Closure | Length of<br>Stay Mean | SD | Length of<br>Stay Med | Range<br>Min | Range<br>Max | Number Primary<br>Closure | Length of<br>Stay Mean | SD | Length of<br>Stay Med | Range<br>Min | Range<br>Max |
|---------------------|------------------------|------------------------|----|-----------------------|--------------|--------------|---------------------------|------------------------|----|-----------------------|--------------|--------------|
| Muster<br>2017 [10] | 48                     | NR                     | NR | 8                     | 7            | 13           | 53                        | NR                     | NR | 7                     | 6            | 11           |
| Han 2019<br>[9]     | 174                    | NR                     | NR | 13                    | 7            | 62           | 54                        | NR                     | NR | 11                    | 5            | 33           |

NR, not reported.

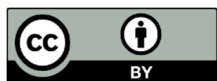

© 2021 by the authors. Licensee MDPI, Basel, Switzerland. This article is an open access article distributed under the terms and conditions of the Creative Commons Attribution (CC BY) license (<http://creativecommons.org/licenses/by/4.0/>).
